# Supplementary material
Source: PubMed Central journal article supplement (PMC1450157)
Supplement: pnas_0508502103_6.pdf [file pnas_0508502103_6.pdf]

**Table 5. Percentage of probable orthologs between pairs of genomes of the order Rhizobiales**

| Genomes                         | Retl   | Smel          | Atuc          | Atuw          | Mlot          | Bmel          | Bsui          | Babo          | Bhen          | Bqui          | Bjap          | Rpal          |
|---------------------------------|--------|---------------|---------------|---------------|---------------|---------------|---------------|---------------|---------------|---------------|---------------|---------------|
| <i>R_etli</i>                   |        | <b>58.40%</b> | <b>54.00%</b> | <b>53.80%</b> | <b>54.40%</b> | <b>34.70%</b> | <b>34.20%</b> | <b>33.30%</b> | <b>16.50%</b> | <b>15.40%</b> | <b>43.80%</b> | <b>34.90%</b> |
| <i>S_meliloti</i>               | 56.80% |               | 50.90%        | 50.50%        | 52.50%        | 34.40%        | 33.80%        | 32.90%        | 16.40%        | 15.30%        | 42.60%        | 34.50%        |
| <i>A_tumefaciens_C58_Cereon</i> | 61.50% | 59.60%        |               | 92.80%        | 54.00%        | 39.60%        | 39.10%        | 37.90%        | 19.10%        | 17.80%        | 46.00%        | 38.90%        |
| <i>A_tumefaciens_C58_UWash</i>  | 60.10% | 58.10%        | 91.10%        |               | 52.70%        | 38.70%        | 38.30%        | 37.00%        | 18.70%        | 17.40%        | 44.90%        | 37.90%        |
| <i>M_loti</i>                   | 48.70% | 48.30%        | 42.40%        | 42.20%        |               | 31.90%        | 31.10%        | 30.20%        | 14.80%        | 13.70%        | 42.50%        | 33.00%        |
| <i>B_melitensis</i>             | 65.60% | 66.70%        | 65.60%        | 65.50%        | 67.30%        |               | 88.40%        | 85.90%        | 32.10%        | 30.10%        | 58.90%        | 53.20%        |
| <i>B_suis_1330</i>              | 61.00% | 61.90%        | 61.20%        | 61.00%        | 61.90%        | 83.40%        |               | 86.40%        | 30.10%        | 28.20%        | 54.80%        | 49.80%        |
| <i>B_abortus_9-941</i>          | 65.10% | 66.20%        | 65.10%        | 64.80%        | 66.20%        | 89.00%        | 94.80%        |               | 32.80%        | 30.60%        | 58.30%        | 53.40%        |
| <i>B_henselae_Houston-1</i>     | 67.90% | 69.60%        | 69.10%        | 68.90%        | 68.10%        | 70.10%        | 69.70%        | 69.10%        |               | 74.40%        | 63.90%        | 62.40%        |
| <i>B_quintana_Toulouse</i>      | 82.00% | 83.50%        | 82.90%        | 82.70%        | 81.60%        | 84.50%        | 84.10%        | 82.90%        | 95.90%        |               | 77.40%        | 76.30%        |
| <i>B_japonicum</i>              | 31.70% | 31.80%        | 29.30%        | 29.20%        | 34.50%        | 22.60%        | 22.30%        | 21.60%        | 11.30%        | 10.60%        |               | 38.80%        |
| <i>R_palustris_CGA009</i>       | 43.50% | 44.20%        | 42.60%        | 42.30%        | 46.10%        | 35.20%        | 34.90%        | 34.10%        | 18.90%        | 17.90%        | 66.70%        |               |

Percentages were calculated in relation to the total protein-coding genes for each species row-wise. The total number of genes per genome are as follows: *R\_etli* (Retl), 6,034; *S\_meliloti* (Smel), 6,205; *A\_tumefaciens\_C58\_Cereon* (Atuc), 5,299; *A\_tumefaciens\_C58\_UWash*, (Atuw), 5,402; *M\_loti* (Mlot), 6,752; *B\_melitensis* (Bmel), 3,197; *B\_suis\_1330* (Bsui), 3,338; *B\_abortus\_9-941* (Babo), 3,085; *B\_henselae\_Houston-1* (Bhen), 1,465; *B\_quintana\_Toulouse* (Bqui), 1,137; *B\_japonicum* (Bjap), 8,317; *R\_palustris\_CGA009* (Rpal), 4,836. Probable orthologs were identified as bidirectional best hits (BDBHs) as described in *Methods*.
