# Supplementary material
Source: PubMed Central journal article supplement (PMC1450157)
Supplement: pnas_0508502103_7.pdf [file pnas_0508502103_7.pdf]

**Table 6. Distribution of orthologs in the chromosome and plasmids of *Rhizobium etli* CFN42 and other Rhizobiales**

| Species                         | Chromosome and plasmids |       |          | Chromosomes |       |          |
|---------------------------------|-------------------------|-------|----------|-------------|-------|----------|
|                                 | BDBHt                   | BDBHs | BDBHs, % | BDBHt       | BDBHs | BDBHs, % |
| <i>S_meliloti</i>               | 3,718                   | 2,667 | 72       | 2,836       | 1,887 | 67%      |
| <i>A_tumefaciens_C58_Cereon</i> | 3,330                   | 2,439 | 73       | 2,582       | 1,545 | 60%      |
| <i>A_tumefaciens_C58_UWash</i>  | 3,315                   | 2,414 | 73       | 2,559       | 1,535 | 60%      |
| <i>M_loti</i>                   | 3,388                   | 2,011 | 59       | 2,601       | 1,590 | 61%      |
| <i>B_melitensis</i>             | 2,156                   | 1,396 | 65       | 1,860       | 977   | 53%      |
| <i>B_suis_1330</i>              | 2,126                   | 1,327 | 62       | 1,831       | 931   | 51%      |
| <i>B_abortus_9-941</i>          | 2,062                   | 1,295 | 63       | 1,787       | 907   | 51%      |
| <i>B_henselae_Houston-1</i>     | 1,015                   | 660   | 65       | 961         | 631   | 66%      |
| <i>B_quintana_Toulouse</i>      | 949                     | 630   | 66       | 903         | 603   | 67%      |
| <i>B_japonicum</i>              | 2,809                   | 1,254 | 45       | 2,177       | 1,039 | 48%      |
| <i>R_palustris_CGA009</i>       | 2,201                   | 1,052 | 48       | 1,814       | 925   | 51%      |

Orthologs were calculated as BDBHs as indicated in ref. 1. BDBHt indicates the total number of orthologs; BDBHs indicates those orthologs in syntenic arrays, considering two or more consecutive BDBH that match in the *R. etli* genome. Percentage of syntenic BDBH is indicated.

1. Moreno-Hagelsieb, G., & Collado-Vides, J. (2002) *Bioinformatics* **18**, Suppl. 1, S329–S336
