# Supplementary material
Source: PubMed Central journal article supplement (PMC1450157)

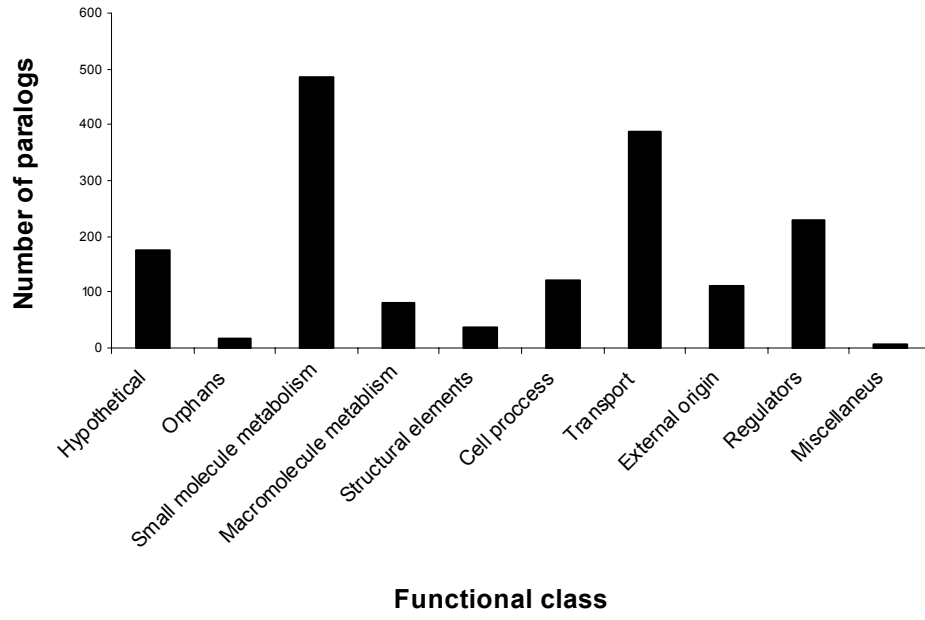

Supplement: pnas_0508502103_2.pdf [file pnas_0508502103_2.pdf]
